# Supplementary material for: Highly sensitive and selective colorimetric determination ofStaphylococcus aureus viachicken anti-protein A IgY antibody
Source: Royal Society of Chemistry journal article supplement (doi:10.1039/c9ay00818g), 2019-01-01
Supplement: c9ay00818g1.pdf [file c9ay00818g1.pdf]

## Supplementary Material

### Highly sensitive and selective colorimetric determination of *Staphylococcus aureus* via chicken anti-protein A IgY antibody

Yun Zhang <sup>a, 1, \*</sup>, Wenqing Tan <sup>a, 1</sup>, Lin Zhang <sup>b</sup>, Shuyou Shi <sup>a</sup>, Yuna Niu <sup>a</sup>, Xue Yang <sup>a</sup>, Jinjuan Qiao <sup>c</sup>,  
Hui Wang <sup>a, \*</sup>

<sup>a</sup> Henan Key Laboratory of Immunology and Targeted Therapy, Henan Collaborative Innovation Center of Molecular Diagnosis and Laboratory Medicine, School of Laboratory Medicine, Xinxiang Medical University, Xinxiang 453003, PR China

<sup>b</sup> School of Innovation and Entrepreneurship, Xinxiang Medical University, Xinxiang 453003, China

<sup>c</sup> Department of Medical Laboratory, Weifang Medical University, Weifang 261053, PR China

<sup>1</sup> these authors contributed equally to this work

\*Corresponding authors: Hui Wang, Tel: +86 373 3831203; Fax: +86 373 3831203; Email:

[huiwang65@yeah.net](mailto:huiwang65@yeah.net)

Yun Zhang, Tel: +86 373 3029977; Fax: +86 373 3029977; Email: [zhangyun0126@126.com](mailto:zhangyun0126@126.com)

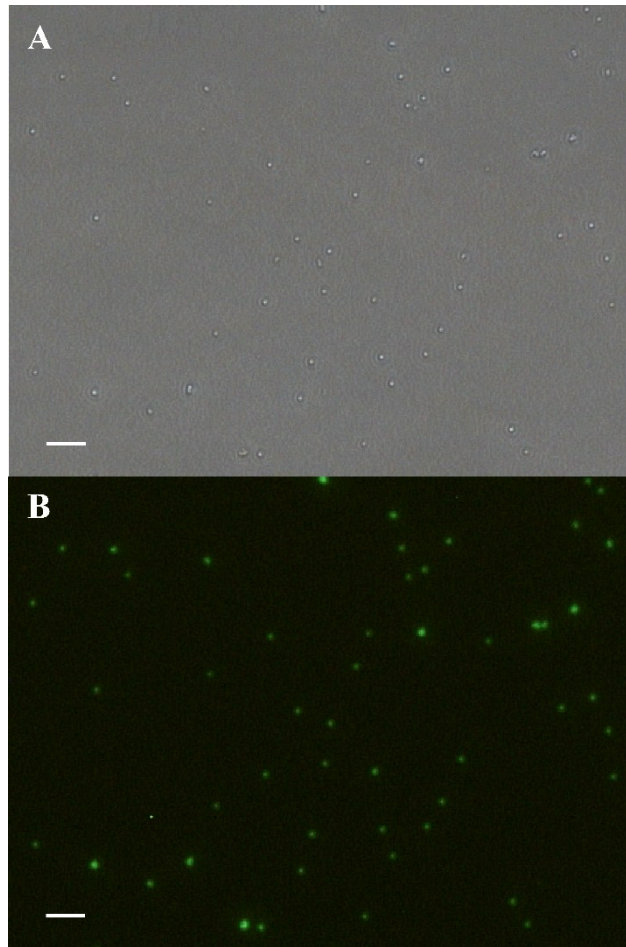

**Fig. S1** Fluorescent micrographs of *S. aureus* stained with FITC. (A) Bright-field image of the stained *S. aureus*. (B) Image showing green fluorescence from FITC stained on *S. aureus*. Bar size: 50  $\mu\text{m}$

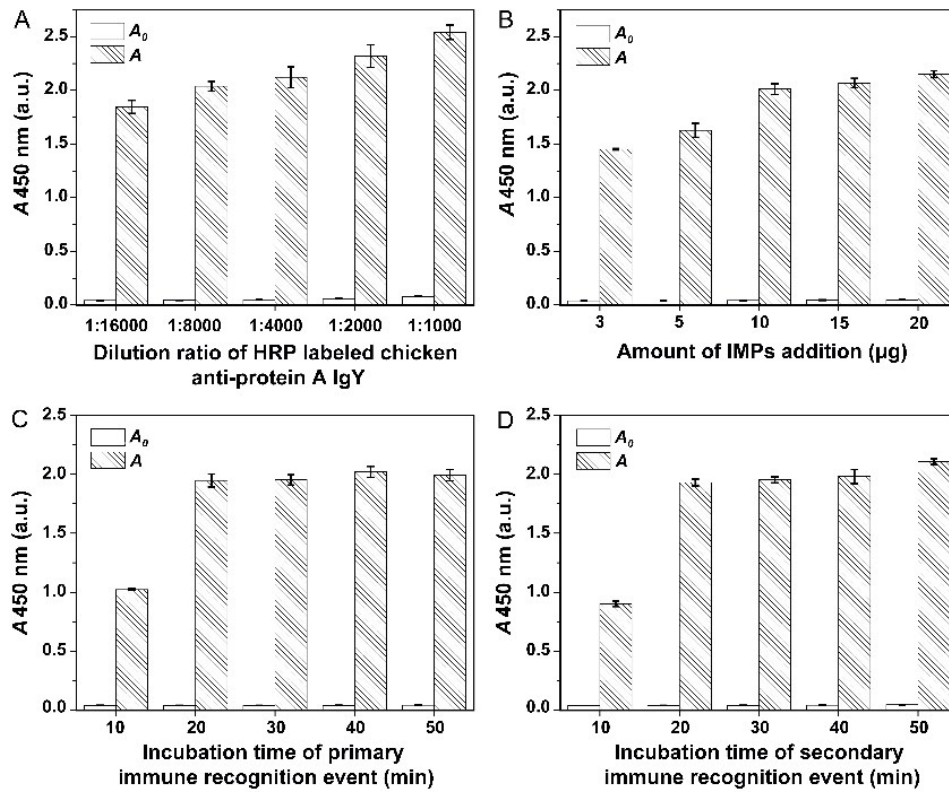

**Fig. S2** Effects of experimental conditions on signals of the system. (A) Effects of the dilution ratio of HRP labelled chicken anti-protein A IgY on  $A$  and  $A_0$ . (B) Effects of the amount of IMPs addition on  $A$  and  $A_0$ . (C) Effects of incubation time of primary immune recognition event on  $A$  and  $A_0$ . (D) Effects of incubation time of secondary immune recognition event on  $A$  and  $A_0$ . Three independent measurements were taken from three individual preparations for each condition. Error bars indicated the standard deviations

**Table S1** Standard deviation test data of negative control

| No. | Absorbance at 450 nm (a.u.) |
|-----|-----------------------------|
| 1   | 0.044                       |
| 2   | 0.045                       |
| 3   | 0.043                       |
| 4   | 0.043                       |
| 5   | 0.043                       |
| 6   | 0.044                       |
| 7   | 0.044                       |
| 8   | 0.044                       |
| 9   | 0.043                       |
| 10  | 0.043                       |

**Table S2** Relative standard deviation test data for reproducibility

| No. | Absorbance at 450 nm (a.u.) |
|-----|-----------------------------|
| 1   | 1.83                        |
| 2   | 1.90                        |
| 3   | 1.998                       |
| 4   | 1.824                       |
| 5   | 1.91                        |
| 6   | 1.949                       |
| 7   | 1.866                       |
| 8   | 1.905                       |
| 9   | 2.035                       |
| 10  | 1.906                       |
| 11  | 2.086                       |

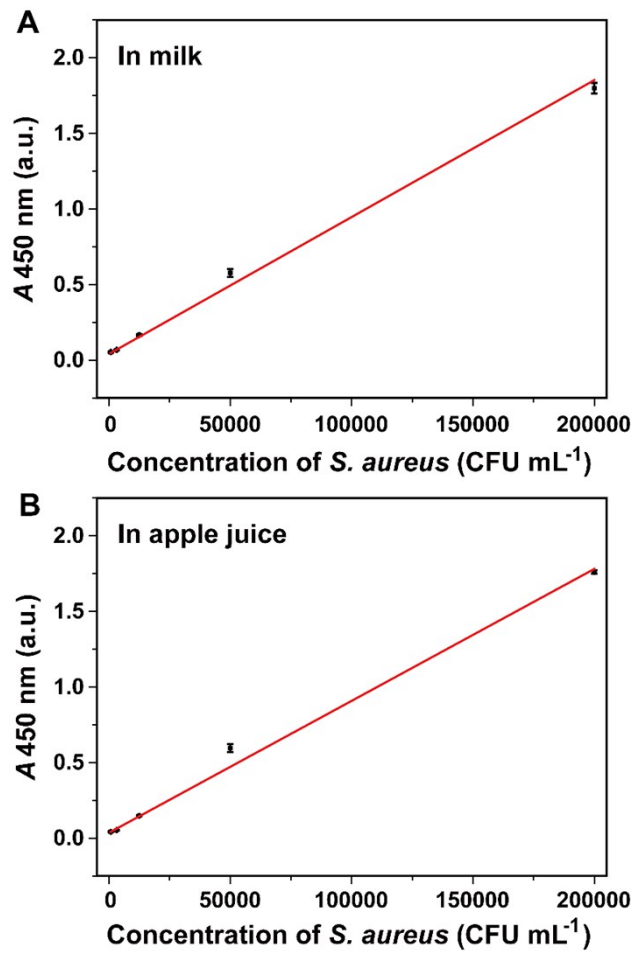

**Fig. S3** Calibration curve of absorbance intensity (450 nm) along with *S. aureus* concentration under the optimal conditions in milk (A) and in apple juice (B), respectively. Three independent measurements were taken from three individual preparations for each condition. Error bars indicated the standard deviations

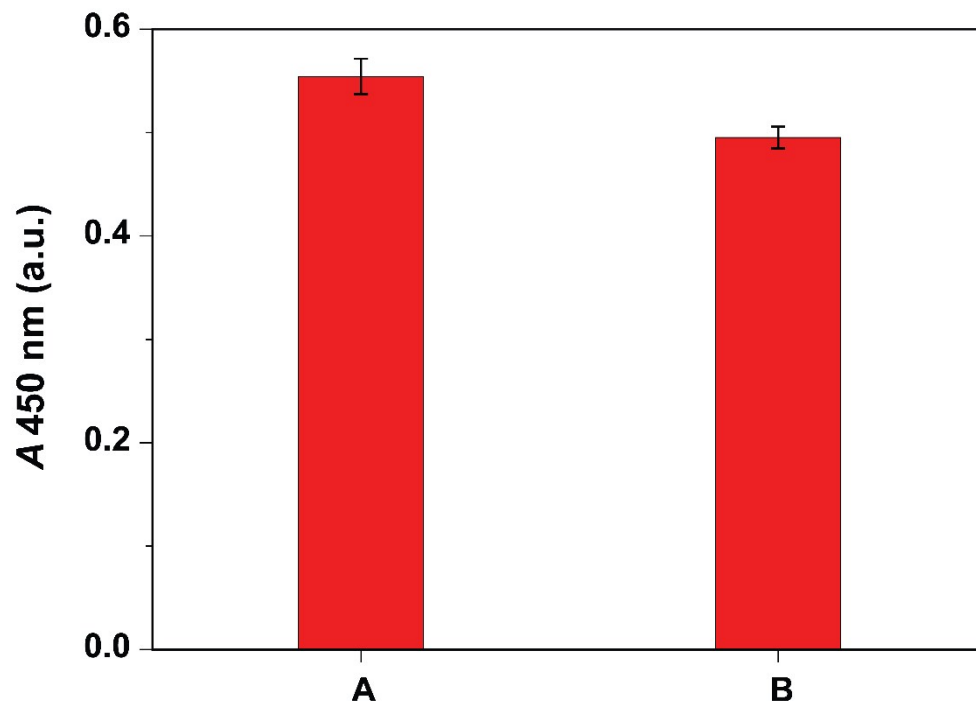

**Fig. S4** Enrichment effect of IMPs for *S. aureus*. A was the result of 100  $\mu\text{L}$  of  $5.0 \times 10^4 \text{ CFU mL}^{-1}$  *S.*

*aureus* and B was 1 mL of  $5.0 \times 10^3 \text{ CFU mL}^{-1}$  *S. aureus*
